# Supplementary material for: Breast Cancer in San Francisco: Disentangling Disparities at the Neighborhood Level
Source: Oxford University Press journal article supplement (doi:10.1158/1055-9965.epi-19-0799), 2019-09-23
Supplement: 10559965epi190799-sup-225342_2_supp_5774827_pxscf9.xlsx [file 10559965epi190799-sup-225342_2_supp_5774827_pxscf9.xlsx]

## Sheet: Table S1
Table S1. 16-categories created by combining race/ethnicity and socioeconomic status information assigned to each of the 579 inhabited block groups in San Francisco
Group	nSES	AANHPI	B/AA	H/L
1	Low	Below median	Below median	Below median
2	High	Below median	Below median	Below median
3	Low	Above median
4	High	Above median
5	Low		Above median
6	High		Above median
7	Low			Above median
8	High			Above median
9	Low	Above median	Above median
10	High	Above median	Above median
11	Low	Above median		Above median
12	High	Above median		Above median
13	Low		Above median	Above median
14	High		Above median	Above median
15	Low	Above median	Above median	Above median
16	High	Above median	Above median	Above median

## Sheet: Table S2
Table S2. Distribution of stage by molecular subtype and race/ethnicity group for female invasive breast cancer cases diagnosed in San Francisco, 2006-2015
		NHW		B/AA		H/L		AANHPI
		N	%	N	%	N	%	N	%
All	HR+/HER2-	1915	0.716	226	0.559	305	0.642	1323	0.648
	HR+/HER2+	243	0.091	41	0.101	58	0.122	222	0.109
	HR-/HER2+	103	0.039	17	0.042	19	0.04	155	0.076
	TNBC	219	0.082	81	0.2	55	0.116	183	0.09
	Unclassified	193	0.072	39	0.097	38	0.08	160	0.078
1. Center-South	HR+/HER2-	205	0.707	10	0.588	19	0.613	129	0.754
	HR+/HER2+	22	0.076	<5	*	<5	*	13	0.076
	HR-/HER2+	10	0.034	<5	*	<5	*	7	0.041
	TNBC	25	0.086	<5	*	0	0	13	0.076
	Unclassified	28	0.097	<5	*	5	0.161	9	0.053
2. Center-West	HR+/HER2-	315	0.743	16	0.696	27	0.659	78	0.645
	HR+/HER2+	29	0.068	<5	*	7	0.171	18	0.149
	HR-/HER2+	19	0.045	0	0	<5	*	7	0.058
	TNBC	37	0.087	<5	*	<5	*	11	0.091
	Unclassified	24	0.057	<5	*	5	0.122	7	0.058
3. Center-East	HR+/HER2-	86	0.711	8	0.533	53	0.646	72	0.655
	HR+/HER2+	15	0.124	<5	*	7	0.085	16	0.145
	HR-/HER2+	<5	*	<5	*	5	0.061	7	0.064
	TNBC	13	0.107	<5	*	13	0.159	8	0.073
	Unclassified	5	0.041	<5	*	<5	*	7	0.064
4. East	HR+/HER2-	156	0.712	10	0.556	22	0.647	47	0.635
	HR+/HER2+	23	0.105	<5	*	<5	*	8	0.108
	HR-/HER2+	11	0.05	0	0	<5	*	<5	*
	TNBC	18	0.082	6	0.333	5	0.147	13	0.176
	Unclassified	11	0.05	0	0	<5	*	<5	*
5. Southeast	HR+/HER2-	86	0.741	86	0.573	53	0.663	153	0.64
	HR+/HER2+	11	0.095	16	0.107	<5	*	28	0.117
	HR-/HER2+	<5	*	5	0.033	<5	*	25	0.105
	TNBC	6	0.052	32	0.213	13	0.163	19	0.079
	Unclassified	10	0.086	11	0.073	7	0.088	14	0.059
6. Southwest	HR+/HER2-	157	0.665	32	0.561	65	0.637	265	0.645
	HR+/HER2+	30	0.127	5	0.088	16	0.157	39	0.095
	HR-/HER2+	10	0.042	<5	*	<5	*	29	0.071
	TNBC	22	0.093	11	0.193	12	0.118	41	0.1
	Unclassified	17	0.072	7	0.123	7	0.069	37	0.09
7. West	HR+/HER2-	265	0.718	7	0.583	22	0.733	313	0.683
	HR+/HER2+	30	0.081	<5	*	<5	*	40	0.087
	HR-/HER2+	16	0.043	0	0	<5	*	32	0.07
	TNBC	36	0.098	<5	*	<5	*	41	0.09
	Unclassified	22	0.06	<5	*	<5	*	32	0.07
8. North	HR+/HER2-	380	0.732	10	0.556	14	0.5	68	0.654
	HR+/HER2+	42	0.081	<5	*	6	0.214	15	0.144
	HR-/HER2+	18	0.035	<5	*	<5	*	5	0.048
	TNBC	40	0.077	<5	*	<5	*	7	0.067
	Unclassified	39	0.075	<5	*	<5	*	9	0.087
9. Northeast	HR+/HER2-	265	0.699	47	0.5	30	0.638	198	0.558
	HR+/HER2+	41	0.108	10	0.106	9	0.191	45	0.127
	HR-/HER2+	14	0.037	6	0.064	<5	*	40	0.113
	TNBC	22	0.058	20	0.213	5	0.106	30	0.085
	Unclassified	37	0.098	11	0.117	<5	*	42	0.118

## Sheet: Table S3
Table S3. [Full version of Table 4] Hazard ratios and 95% confidence intervals for female invasive breast cancer cases living in San Francisco, 2006-2015
		Breast cancer specific mortality HR (95% CI)
	N deaths	Model A	Model B	Model C	Model D	Model E	Model F	Model G	Model H	Model I	Model J	Model K
Neighborhood
1. Center-South	38	1.55 (0.98-2.46)	1.52 (0.96-2.41)	1.55 (0.99-2.43)	1.53 (0.97-2.39)	1.60 (1.01-2.52)	1.55 (1.00-2.42)	1.29 (0.79-2.10)	1.18 (0.72-1.93)	1.24 (0.73-2.12)	1.26 (0.74-2.15)	1.23 (0.72-2.12)
2. Center-West	40	1.37 (0.87-2.16)	1.43 (0.90-2.26)	1.48 (0.93-2.35)	1.46 (0.92-2.31)	1.42 (0.89-2.26)	1.49 (0.94-2.36)	1.10 (0.68-1.76)	1.03 (0.64-1.67)	1.03 (0.61-1.73)	1.04 (0.62-1.75)	1.04 (0.62-1.75)
3. Center-East	18	1.15 (0.66-1.99)	1.22 (0.70-2.11)	1.33 (0.69-2.59)	1.32 (0.68-2.56)	1.15 (0.59-2.22)	1.04 (0.53-2.01)	1.20 (0.59-2.40)	1.18 (0.59-2.35)	1.25 (0.60-2.58)	1.27 (0.62-2.63)	1.29 (0.63-2.64)
4. East	17	1.00 (0.59-1.70)	1.11 (0.65-1.92)	1.09 (0.63-1.87)	1.04 (0.61-1.79)	1.02 (0.59-1.75)	0.98 (0.57-1.67)	0.80 (0.48-1.35)	0.76 (0.43-1.32)	0.81 (0.46-1.43)	0.82 (0.46-1.44)	0.77 (0.43-1.38)
5. Southeast	49	1.70 (1.11-2.58)	1.78 (1.17-2.69)	1.67 (0.95-2.94)	1.33 (0.74-2.39)	1.30 (0.72-2.35)	1.20 (0.68-2.12)	0.93 (0.49-1.77)	0.99 (0.53-1.84)	0.96 (0.49-1.87)	0.98 (0.50-1.92)	1.00 (0.52-1.92)
6. Southwest	49	1.15 (0.76-1.73)	1.16 (0.77-1.75)	1.24 (0.71-2.17)	1.17 (0.66-2.05)	1.19 (0.68-2.09)	1.07 (0.62-1.84)	0.89 (0.49-1.61)	0.90 (0.51-1.58)	0.90 (0.48-1.69)	0.92 (0.50-1.72)	0.94 (0.51-1.73)
7. West	56	1.26 (0.82-1.94)	1.25 (0.82-1.92)	1.61 (0.99-2.63)	1.64 (1.00-2.70)	1.64 (1.00-2.70)	1.61 (1.00-2.59)	1.09 (0.62-1.89)	1.09 (0.64-1.87)	1.13 (0.63-2.03)	1.14 (0.63-2.05)	1.16 (0.65-2.07)
8. North	33	Ref	Ref	Ref	Ref	Ref	Ref	Ref	Ref	Ref	Ref	Ref
9. Northeast	75	1.82 (1.23-2.68)	1.74 (1.18-2.57)	1.74 (1.03-2.93)	1.69 (1.00-2.86)	1.52 (0.90-2.58)	1.42 (0.86-2.36)	1.19 (0.65-2.16)	1.23 (0.70-2.18)	1.18 (0.63-2.22)	1.21 (0.65-2.26)	1.22 (0.66-2.26)
Age (per year)			1.02 (1.02-1.03)	1.02 (1.02-1.03)	1.02 (1.02-1.03)	1.02 (1.01-1.03)	1.02 (1.01-1.03)	1.03 (1.02-1.04)	1.03 (1.02-1.04)	1.02 (1.01-1.03)	1.02 (1.01-1.03)	1.02 (1.01-1.03)
SES Quintile
1	103			1.21 (0.75-1.94)	1.10 (0.68-1.77)	0.99 (0.61-1.59)	1.06 (0.66-1.69)	1.11 (0.62-1.99)	1.02 (0.60-1.73)	1.10 (0.61-1.98)	1.07 (0.59-1.92)	1.04 (0.59-1.84)
2	79			0.89 (0.56-1.41)	0.86 (0.54-1.38)	0.83 (0.52-1.33)	0.92 (0.59-1.45)	0.98 (0.56-1.70)	0.90 (0.54-1.52)	0.94 (0.53-1.66)	0.92 (0.52-1.62)	0.90 (0.52-1.55)
3	56			0.63 (0.41-0.95)	0.61 (0.40-0.93)	0.58 (0.38-0.89)	0.61 (0.40-0.92)	0.78 (0.47-1.31)	0.72 (0.44-1.18)	0.76 (0.46-1.28)	0.75 (0.45-1.26)	0.74 (0.44-1.23)
4	70			1.03 (0.74-1.44)	1.01 (0.73-1.40)	0.95 (0.69-1.32)	0.95 (0.69-1.31)	1.05 (0.73-1.50)	1.02 (0.72-1.46)	1.00 (0.68-1.45)	0.99 (0.68-1.44)	0.98 (0.67-1.43)
5	67			Ref	Ref	Ref	Ref	Ref	Ref	Ref	Ref	Ref
Race/Ethnicity
NHW	160				Ref	Ref	Ref	Ref	Ref	Ref	Ref	Ref
B/AA	56				2.31 (1.64-3.25)	2.11 (1.50-2.98)	1.73 (1.20-2.48)	1.70 (1.20-2.40)	1.60 (1.13-2.27)	1.64 (1.16-2.30)	1.63 (1.16-2.29)	1.63 (1.16-2.30)
H/L	33				1.16 (0.79-1.72)	1.06 (0.72-1.57)	1.03 (0.70-1.54)	1.12 (0.78-1.60)	1.16 (0.80-1.67)	1.16 (0.80-1.69)	1.16 (0.80-1.70)	1.17 (0.80-1.71)
AANHPI	125				1.03 (0.80-1.31)	1.00 (0.78-1.29)	0.99 (0.77-1.28)	1.03 (0.79-1.33)	1.04 (0.80-1.36)	1.03 (0.78-1.35)	1.03 (0.78-1.35)	1.03 (0.78-1.35)
Other/Unknown	<5				0.59 (0.09-4.01)	0.49 (0.07-3.47)	0.42 (0.06-3.22)	0.67 (0.10-4.60)	0.73 (0.09-5.97)	0.66 (0.09-4.99)	0.65 (0.08-4.94)	0.64 (0.08-5.11)
Marital Status
Married	131					Ref	Ref	Ref	Ref	Ref	Ref	Ref
Unknown	16					2.40 (1.39-4.14)	2.56 (1.47-4.46)	1.49 (0.87-2.55)	1.55 (0.90-2.65)	1.29 (0.76-2.20)	1.27 (0.74-2.16)	1.24 (0.73-2.11)
Unmarried	228					1.36 (1.07-1.72)	1.30 (1.02-1.66)	1.08 (0.85-1.37)	1.05 (0.82-1.34)	1.03 (0.80-1.31)	1.02 (0.80-1.31)	1.01 (0.79-1.30)
Insurance Status
Any Public/ Medicaid/ Military	134					1.41 (1.09-1.84)	1.39 (1.07-1.82)	0.88 (0.68-1.14)	0.85 (0.65-1.12)	0.91 (0.70-1.19)	0.91 (0.70-1.20)	0.91 (0.69-1.19)
Medicare only or Medicare + Private	35					0.78 (0.53-1.16)	0.81 (0.55-1.19)	0.76 (0.50-1.14)	0.75 (0.49-1.14)	0.82 (0.54-1.27)	0.83 (0.54-1.28)	0.83 (0.54-1.28)
No insurance	21					1.75 (1.07-2.89)	1.76 (1.07-2.88)	1.43 (0.88-2.30)	1.37 (0.84-2.22)	1.52 (0.93-2.48)	1.49 (0.91-2.43)	1.53 (0.94-2.49)
Private only	179					Ref	Ref	Ref	Ref	Ref	Ref	Ref
Unknown	6					2.64 (1.09-6.40)	2.54 (1.07-6.07)	2.21 (1.09-4.51)	1.97 (0.91-4.26)	2.27 (1.02-5.06)	2.27 (1.01-5.11)	2.37 (1.08-5.20)
Molecular Subtype
HR+/HER2+	32						1.13 (0.79-1.61)	0.75 (0.52-1.06)	0.63 (0.43-0.91)	0.64 (0.44-0.94)	0.65 (0.45-0.95)	0.69 (0.47-1.02)
HR+/HER2-	176						Ref	Ref	Ref	Ref	Ref	Ref
HR-/HER2+	27						1.82 (1.21-2.74)	1.10 (0.72-1.69)	0.86 (0.55-1.35)	0.79 (0.49-1.27)	0.79 (0.49-1.27)	0.85 (0.51-1.41)
TNBC	91						3.89 (2.99-5.08)	3.36 (2.57-4.38)	2.70 (2.01-3.61)	2.71 (2.01-3.67)	2.73 (2.02-3.68)	2.93 (2.14-4.01)
Unclassified	49						2.24 (1.62-3.11)	1.39 (0.98-1.97)	1.03 (0.71-1.51)	0.97 (0.67-1.42)	0.96 (0.66-1.41)	0.96 (0.66-1.42)
Grade
Grade I	30								Ref	Ref	Ref	Ref
Grade II	109								1.49 (1.03-2.17)	1.49 (1.02-2.18)	1.49 (1.02-2.18)	1.55 (1.06-2.25)
Grade III/IV	152								2.23 (1.50-3.33)	2.44 (1.63-3.64)	2.42 (1.62-3.62)	2.53 (1.68-3.79)
Unknown	84								3.07 (1.91-4.94)	2.25 (1.38-3.66)	2.26 (1.39-3.67)	2.28 (1.40-3.71)
Type of Surgery
BCS	111									Ref	Ref	Ref
Mastectomy	118									1.28 (0.94-1.74)	1.24 (0.90-1.71)	1.25 (0.91-1.73)
No surgery	146									3.37 (2.28-4.98)	3.20 (2.12-4.83)	3.14 (2.07-4.74)
Radiation
No	204										Ref	Ref
Yes	171										0.90 (0.69-1.17)	0.93 (0.71-1.20)
Chemotherapy
No	190											Ref
Yes	185											0.76 (0.58-1.00)
Stage
1	36
2	86
3	106
4	126
9	21
* Stage included as a stratification variable
Model A: Neighborhood
Model B: Neighborhood + Age
Model C: Neighborhood + Age + nSES
Model D: Neighborhood + Age + nSES + Race/ethnicity
Model E: Neighborhood + Age + nSES + Race/ethnicity + Marital status + Insurance
Model F: Neighborhood + Age + nSES + Race/ethnicity + Marital status + Insurance + Subtype
Model G: Neighborhood + Age + nSES + Race/ethnicity + Marital status + Insurance + Subtype + Stage(stratification variable)
Model H: Neighborhood + Age + nSES + Race/ethnicity + Marital status + Insurance + Subtype + Stage(stratification variable) + Grade
Model I: Neighborhood + Age + nSES + Race/ethnicity + Marital status + Insurance + Subtype + Stage(stratification variable) + Grade + Surgery
Model J: Neighborhood + Age + nSES + Race/ethnicity + Marital status + Insurance + Subtype + Stage(stratification variable) + Grade + Surgery + Radiation
Model K: Neighborhood + Age + nSES + Race/ethnicity + Marital status + Insurance + Subtype + Stage(stratification variable) + Grade + Surgery + Radiation+ Chemotherapy

## Sheet: Table S4
Table S4. Hazard ratios and 95% confidence intervals for female invasive breast cancer cases living in San Francisco, 2006-2015
		Overall mortality HR (95% CI)
	N deaths	Model A	Model B	Model C	Model D	Model E	Model F	Model G	Model H	Model I	Model J	Model K
Neighborhood
1. Center-South	63	1.24 (0.83-1.86)	1.21 (0.83-1.76)	1.21 (0.84-1.74)	1.23 (0.86-1.77)	1.29 (0.91-1.84)	1.26 (0.89-1.79)	1.11 (0.76-1.62)	1.04 (0.71-1.51)	1.03 (0.70-1.53)	1.06 (0.71-1.58)	1.06 (0.71-1.58)
2. Center-West	63	1.03 (0.71-1.50)	1.14 (0.80-1.62)	1.17 (0.82-1.66)	1.16 (0.82-1.66)	1.16 (0.81-1.65)	1.18 (0.82-1.69)	1.05 (0.73-1.50)	0.99 (0.69-1.42)	0.96 (0.65-1.41)	0.98 (0.66-1.44)	0.98 (0.66-1.45)
3. Center-East	33	1.01 (0.62-1.65)	1.11 (0.71-1.71)	1.02 (0.62-1.69)	1.12 (0.67-1.86)	1.00 (0.60-1.66)	0.92 (0.55-1.53)	0.97 (0.57-1.67)	0.95 (0.57-1.60)	0.99 (0.56-1.73)	1.02 (0.59-1.77)	1.02 (0.59-1.77)
4. East	29	0.82 (0.53-1.26)	1.04 (0.69-1.57)	1.01 (0.67-1.53)	1.01 (0.67-1.52)	0.98 (0.65-1.49)	0.95 (0.62-1.47)	0.87 (0.56-1.34)	0.82 (0.53-1.28)	0.85 (0.54-1.33)	0.87 (0.55-1.36)	0.85 (0.54-1.34)
5. Southeast	87	1.44 (1.00-2.06)	1.60 (1.15-2.23)	1.33 (0.85-2.09)	1.15 (0.72-1.84)	1.15 (0.72-1.83)	1.08 (0.68-1.71)	0.97 (0.59-1.60)	0.98 (0.60-1.59)	0.98 (0.58-1.67)	1.05 (0.62-1.76)	1.05 (0.63-1.75)
6. Southwest	95	1.06 (0.75-1.49)	1.10 (0.80-1.52)	1.01 (0.66-1.55)	1.00 (0.65-1.55)	1.03 (0.67-1.59)	0.93 (0.60-1.43)	0.91 (0.57-1.44)	0.89 (0.57-1.39)	0.91 (0.56-1.49)	0.96 (0.60-1.56)	0.97 (0.60-1.56)
7. West	114	1.23 (0.87-1.73)	1.21 (0.88-1.66)	1.33 (0.91-1.95)	1.41 (0.96-2.08)	1.43 (0.97-2.10)	1.39 (0.95-2.04)	1.13 (0.75-1.70)	1.11 (0.74-1.65)	1.12 (0.71-1.74)	1.14 (0.74-1.78)	1.15 (0.75-1.78)
8. North	69	Ref	Ref	Ref	Ref	Ref	Ref	Ref	Ref	Ref	Ref	Ref
9. Northeast	137	1.59 (1.14-2.23)	1.47 (1.08-2.01)	1.29 (0.86-1.95)	1.31 (0.87-1.98)	1.21 (0.80-1.82)	1.13 (0.75-1.70)	1.10 (0.69-1.77)	1.08 (0.68-1.70)	1.05 (0.64-1.74)	1.13 (0.69-1.85)	1.13 (0.69-1.84)
Age (per year)	.		1.05 (1.05-1.06)	1.05 (1.05-1.06)	1.05 (1.05-1.06)	1.05 (1.04-1.06)	1.05 (1.04-1.06)	1.05 (1.04-1.06)	1.05 (1.04-1.06)	1.05 (1.04-1.05)	1.05 (1.04-1.05)	1.04 (1.04-1.05)
SES Quintile
1	180			1.40 (0.96-2.04)	1.34 (0.92-1.96)	1.24 (0.84-1.81)	1.31 (0.90-1.92)	1.31 (0.84-2.05)	1.26 (0.83-1.93)	1.30 (0.81-2.08)	1.21 (0.77-1.91)	1.21 (0.77-1.89)
2	160			1.13 (0.79-1.62)	1.12 (0.79-1.61)	1.09 (0.76-1.57)	1.19 (0.83-1.70)	1.21 (0.79-1.86)	1.15 (0.77-1.73)	1.17 (0.74-1.84)	1.10 (0.71-1.71)	1.09 (0.71-1.69)
3	113			0.81 (0.59-1.11)	0.81 (0.59-1.11)	0.78 (0.56-1.07)	0.82 (0.59-1.13)	0.95 (0.65-1.40)	0.91 (0.63-1.31)	0.92 (0.62-1.37)	0.88 (0.59-1.29)	0.87 (0.59-1.28)
4	125			1.14 (0.87-1.49)	1.14 (0.88-1.48)	1.09 (0.84-1.42)	1.08 (0.84-1.41)	1.19 (0.90-1.57)	1.17 (0.89-1.53)	1.15 (0.86-1.54)	1.12 (0.84-1.49)	1.11 (0.84-1.49)
5	112			Ref	Ref	Ref	Ref	Ref	Ref	Ref	Ref	Ref
Race/Ethnicity
NHW	326				Ref	Ref	Ref	Ref	Ref	Ref	Ref	Ref
B/AA	97				1.91 (1.49-2.46)	1.79 (1.39-2.29)	1.56 (1.20-2.03)	1.57 (1.23-2.01)	1.51 (1.18-1.93)	1.50 (1.17-1.93)	1.48 (1.15-1.89)	1.48 (1.15-1.90)
H/L	54				0.86 (0.64-1.16)	0.80 (0.59-1.08)	0.79 (0.58-1.07)	0.86 (0.64-1.15)	0.87 (0.65-1.17)	0.85 (0.62-1.15)	0.85 (0.62-1.17)	0.86 (0.62-1.17)
AANHPI	210				0.87 (0.73-1.04)	0.86 (0.72-1.03)	0.86 (0.71-1.03)	0.87 (0.72-1.06)	0.87 (0.72-1.07)	0.86 (0.70-1.05)	0.86 (0.70-1.05)	0.86 (0.70-1.05)
Other/Unknown	<5				0.75 (0.24-2.29)	0.64 (0.21-2.00)	0.53 (0.17-1.73)	0.66 (0.21-2.10)	0.72 (0.23-2.26)	0.62 (0.21-1.78)	0.60 (0.20-1.76)	0.60 (0.20-1.84)
Marital Status
Married	223					Ref	Ref	Ref	Ref	Ref	Ref	Ref
Unknown	24					2.09 (1.33-3.28)	2.23 (1.42-3.50)	1.64 (1.09-2.46)	1.64 (1.10-2.45)	1.35 (0.89-2.02)	1.27 (0.84-1.92)	1.26 (0.84-1.90)
Unmarried	443					1.37 (1.16-1.62)	1.31 (1.10-1.57)	1.16 (0.97-1.38)	1.13 (0.95-1.35)	1.12 (0.93-1.34)	1.11 (0.92-1.34)	1.11 (0.92-1.33)
Insurance Status
Any Public/ Medicaid/ Military	248					1.37 (1.13-1.67)	1.34 (1.10-1.63)	1.01 (0.83-1.23)	1.01 (0.83-1.23)	1.05 (0.86-1.28)	1.05 (0.86-1.28)	1.05 (0.86-1.28)
Medicare only or Medicare + Private	110					1.02 (0.80-1.29)	1.04 (0.82-1.32)	1.04 (0.81-1.34)	1.05 (0.81-1.35)	1.13 (0.87-1.46)	1.16 (0.89-1.51)	1.16 (0.89-1.51)
No insurance	36					1.64 (1.14-2.38)	1.62 (1.13-2.33)	1.37 (0.96-1.94)	1.33 (0.93-1.90)	1.40 (0.99-1.99)	1.30 (0.92-1.85)	1.31 (0.93-1.87)
Private only	287					Ref	Ref	Ref	Ref	Ref	Ref	Ref
Unknown	9					2.01 (0.91-4.40)	1.95 (0.96-3.95)	1.51 (0.81-2.81)	1.38 (0.70-2.73)	1.62 (0.80-3.29)	1.61 (0.77-3.35)	1.65 (0.81-3.37)
Molecular Subtype
HR+/HER2+	65						1.29 (1.01-1.65)	1.01 (0.78-1.31)	0.92 (0.70-1.20)	0.94 (0.72-1.23)	0.96 (0.73-1.25)	0.99 (0.75-1.30)
HR+/HER2-	363						Ref	Ref	Ref	Ref	Ref	Ref
HR-/HER2+	39						1.46 (1.05-2.03)	1.13 (0.80-1.60)	0.97 (0.67-1.41)	0.93 (0.63-1.36)	0.92 (0.62-1.36)	0.96 (0.64-1.46)
TNBC	129						2.78 (2.24-3.45)	2.42 (1.97-2.99)	2.18 (1.73-2.74)	2.27 (1.79-2.87)	2.31 (1.83-2.91)	2.40 (1.88-3.05)
Unclassified	94						1.95 (1.54-2.47)	1.44 (1.11-1.87)	1.17 (0.89-1.55)	1.12 (0.85-1.49)	1.07 (0.81-1.42)	1.07 (0.81-1.43)
Grade
Grade I	103								Ref	Ref	Ref	Ref
Grade II	231								1.17 (0.94-1.45)	1.15 (0.92-1.43)	1.15 (0.92-1.43)	1.16 (0.93-1.45)
Grade III/IV	227								1.41 (1.12-1.79)	1.46 (1.15-1.86)	1.45 (1.14-1.85)	1.49 (1.17-1.90)
Unknown	129								2.16 (1.56-3.00)	1.60 (1.14-2.24)	1.62 (1.16-2.26)	1.63 (1.16-2.28)
Type of Surgery
BCS	274									Ref	Ref	Ref
Mastectomy	203									1.32 (1.06-1.64)	1.11 (0.88-1.41)	1.12 (0.88-1.42)
No surgery	213									2.94 (2.14-4.03)	2.41 (1.74-3.33)	2.38 (1.72-3.31)
Radiation
No	405										Ref	Ref
Yes	285										0.69 (0.57-0.83)	0.69 (0.57-0.84)
Chemotherapy
No	442											Ref
Yes	248											0.86 (0.69-1.07)
Stage
1	173
2	190
3	136
4	149
9	42
* Stage included as a stratification variable
Model A: Neighborhood
Model B: Neighborhood + Age
Model C: Neighborhood + Age + nSES
Model D: Neighborhood + Age + nSES + Race/ethnicity
Model E: Neighborhood + Age + nSES + Race/ethnicity + Marital status + Insurance
Model F: Neighborhood + Age + nSES + Race/ethnicity + Marital status + Insurance + Subtype
Model G: Neighborhood + Age + nSES + Race/ethnicity + Marital status + Insurance + Subtype + Stage(stratification variable)
Model H: Neighborhood + Age + nSES + Race/ethnicity + Marital status + Insurance + Subtype + Stage(stratification variable) + Grade
Model I: Neighborhood + Age + nSES + Race/ethnicity + Marital status + Insurance + Subtype + Stage(stratification variable) + Grade + Surgery
Model J: Neighborhood + Age + nSES + Race/ethnicity + Marital status + Insurance + Subtype + Stage(stratification variable) + Grade + Surgery + Radiation
Model K: Neighborhood + Age + nSES + Race/ethnicity + Marital status + Insurance + Subtype + Stage(stratification variable) + Grade + Surgery + Radiation+ Chemotherapy

## Sheet: Table S5
Table S5: [Full Version of Table 3] Sequential logistic models for the association between neighborhood area and diagnosis at stage IIB+
	Model 1 (Univariable)	Model 2 (+Age)	Model 3 (+Race/Ethnicity)	Model 4 (+SES Quintile)	Model 5 (+Insurance)	Model 6 (+Marital Status)	Model 7 (+Subtype)
Neighborhood
1. Center-South	1.17 ( 0.87- 1.56)	1.20 ( 0.89- 1.60)	1.18 ( 0.88- 1.59)	1.19 ( 0.89- 1.60)	1.20 ( 0.89- 1.61)	1.24 ( 0.92- 1.67)	1.27 ( 0.94- 1.71)
2. Center-West	1.48 ( 1.13- 1.94)	1.46 ( 1.11- 1.92)	1.45 ( 1.10- 1.91)	1.46 ( 1.11- 1.92)	1.48 ( 1.12- 1.95)	1.50 ( 1.13- 1.97)	1.53 ( 1.16- 2.02)
3. Center-East	1.41 ( 1.02- 1.95)	1.37 ( 0.99- 1.90)	1.26 ( 0.90- 1.75)	1.05 ( 0.70- 1.59)	1.03 ( 0.68- 1.56)	1.00 ( 0.66- 1.51)	0.99 ( 0.65- 1.50)
4. East	1.30 ( 0.95- 1.79)	1.25 ( 0.91- 1.72)	1.22 ( 0.88- 1.68)	1.19 ( 0.86- 1.64)	1.18 ( 0.85- 1.63)	1.16 ( 0.84- 1.60)	1.17 ( 0.84- 1.62)
5. Southeast	1.77 ( 1.35- 2.32)	1.76 ( 1.35- 2.31)	1.57 ( 1.18- 2.09)	1.21 ( 0.82- 1.78)	1.23 ( 0.84- 1.82)	1.27 ( 0.86- 1.87)	1.25 ( 0.84- 1.86)
6. Southwest	1.21 ( 0.94- 1.57)	1.23 ( 0.95- 1.60)	1.17 ( 0.90- 1.53)	0.94 ( 0.65- 1.36)	0.98 ( 0.68- 1.42)	0.99 ( 0.69- 1.44)	0.96 ( 0.66- 1.40)
7. West	1.24 ( 0.96- 1.61)	1.26 ( 0.97- 1.62)	1.26 ( 0.97- 1.64)	1.21 ( 0.88- 1.68)	1.24 ( 0.90- 1.72)	1.27 ( 0.91- 1.75)	1.27 ( 0.91- 1.76)
8. North	Ref	Ref	Ref	Ref	Ref	Ref	Ref
9. Northeast	1.64 ( 1.28- 2.11)	1.70 ( 1.32- 2.18)	1.64 ( 1.27- 2.12)	1.30 ( 0.91- 1.86)	1.26 ( 0.88- 1.80)	1.24 ( 0.86- 1.77)	1.19 ( 0.83- 1.71)
Age
20-49		1.34 ( 1.12- 1.60)	1.35 ( 1.13- 1.61)	1.35 ( 1.13- 1.62)	1.40 ( 1.17- 1.67)	1.40 ( 1.17- 1.67)	1.39 ( 1.16- 1.67)
50-59		Ref	Ref	Ref	Ref	Ref	Ref
60-69		0.92 ( 0.77- 1.11)	0.92 ( 0.77- 1.11)	0.92 ( 0.77- 1.11)	0.88 ( 0.73- 1.07)	0.88 ( 0.72- 1.06)	0.90 ( 0.74- 1.09)
70+		0.84 ( 0.70- 1.01)	0.84 ( 0.70- 1.00)	0.83 ( 0.70- 1.00)	0.75 ( 0.62- 0.91)	0.72 ( 0.59- 0.87)	0.75 ( 0.61- 0.91)
Race/Ethnicity
NHW			Ref	Ref	Ref	Ref	Ref
B/AA			1.41 ( 1.09- 1.82)	1.36 ( 1.05- 1.75)	1.27 ( 0.98- 1.65)	1.22 ( 0.94- 1.58)	1.17 ( 0.90- 1.52)
H/L			1.44 ( 1.14- 1.82)	1.40 ( 1.11- 1.77)	1.31 ( 1.03- 1.66)	1.29 ( 1.02- 1.64)	1.27 ( 1.00- 1.61)
AANHPI			1.01 ( 0.87- 1.17)	0.99 ( 0.85- 1.15)	0.96 ( 0.82- 1.12)	1.01 ( 0.87- 1.18)	0.97 ( 0.83- 1.13)
Other/Unknown			1.12 ( 0.46- 2.74)	1.10 ( 0.45- 2.69)	0.98 ( 0.40- 2.42)	0.94 ( 0.38- 2.33)	0.89 ( 0.36- 2.23)
SES Quintile
1				1.48 ( 1.05- 2.08)	1.29 ( 0.91- 1.82)	1.27 ( 0.90- 1.80)	1.29 ( 0.91- 1.84)
2				1.31 ( 0.95- 1.81)	1.21 ( 0.87- 1.67)	1.21 ( 0.87- 1.67)	1.23 ( 0.89- 1.70)
3				1.00 ( 0.75- 1.34)	0.95 ( 0.71- 1.28)	0.94 ( 0.70- 1.25)	0.94 ( 0.70- 1.27)
4				1.07 ( 0.87- 1.33)	1.05 ( 0.85- 1.30)	1.03 ( 0.83- 1.28)	1.02 ( 0.82- 1.26)
5				Ref	Ref	Ref	Ref
Insurance Status
Any Public/ Medicaid/ Military					Ref	Ref	Ref
Medicare only or Medicare + Private					1.76 ( 1.51- 2.05)	1.73 ( 1.48- 2.02)	1.68 ( 1.43- 1.96)
No insurance					1.13 ( 0.88- 1.45)	1.13 ( 0.88- 1.46)	1.14 ( 0.89- 1.47)
Private only					1.27 ( 0.89- 1.79)	1.29 ( 0.91- 1.83)	1.25 ( 0.88- 1.78)
Unknown					0.63 ( 0.21- 1.89)	0.59 ( 0.20- 1.79)	0.55 ( 0.18- 1.67)
Marital Status
Unknown						1.86 ( 1.29- 2.69)	1.82 ( 1.26- 2.64)
Unmarried						1.35 ( 1.18- 1.55)	1.34 ( 1.17- 1.54)
Married						Ref	Ref
Subtype
HR+/HER2-							Ref
HR+/HER2+							1.67 ( 1.36- 2.04)
HR-/HER2+							2.29 ( 1.77- 2.97)
TNBC							1.43 ( 1.16- 1.77)
Unclassified							1.63 ( 1.26- 2.10)
